# Supplementary material for: Twisting of a Pristine α-Fe Nanowire: From Wild Dislocation Avalanches to Mild Local Amorphization
Source: MDPI journal article supplement (doi:10.3390/nano11061602), 2021-06-18
Supplement: s1 [file s1]

# Twisting of a Pristine $\alpha$ -Fe Nanowire: From Wild Dislocation Avalanches to Mild Local Amorphization

Yang Yang <sup>1</sup>, Xiangdong Ding <sup>1,\*</sup>, Jun Sun <sup>1</sup> and Ekhard K. H. Salje <sup>1,2,\*</sup>

<sup>1</sup> State Key Laboratory for Mechanical Behaviour of Materials, School of Materials Science and Engineering, Xi'an Jiaotong University, Xi'an 710049, China; yangymse@xjtu.edu.cn (Y.Y.); junsun@mail.xjtu.edu.cn (J.S.)

<sup>2</sup> Department of Earth Sciences, University of Cambridge, Cambridge CB2 3EQ, UK

\* Correspondence: dingxd@mail.xjtu.edu.cn (X.D.); ekhard@esc.cam.ac.uk (E.K.H.S.)

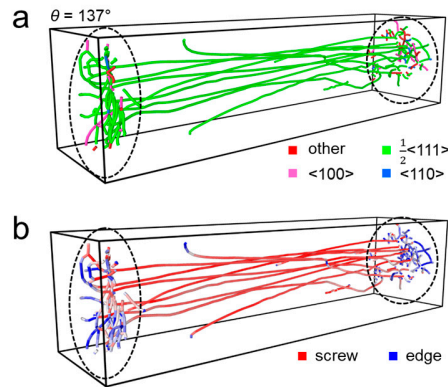

Figure S1. Dislocation structure characteristic analysis at  $\theta = 137^\circ$ . (a). Burgers vectors and (b) dislocation types are analyzed by the Dislocation Extraction Algorithm (DXA) in the structural visualization package OVITO [28, 29]. The dashed circles indicate the dislocation wall near the loading end.

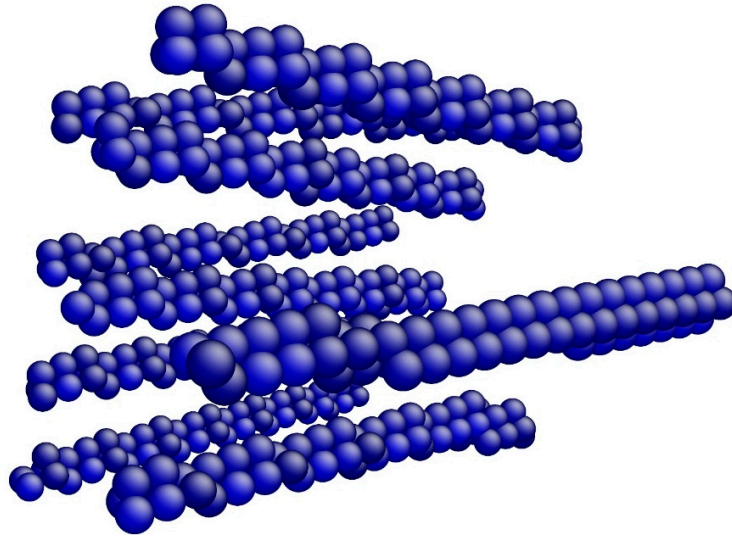

Figure S2. Atomic dislocation-core structure at  $\theta = 137^\circ$ .

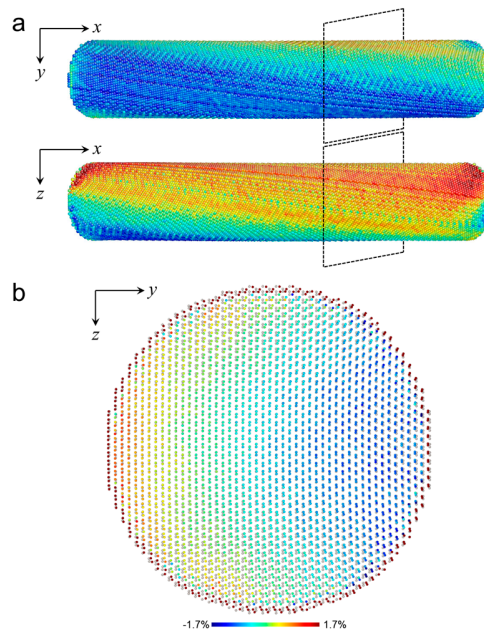

Figure S3. Atomic volume increment at  $\theta = 76.5^\circ$ . The grey atoms are at  $\theta = 0^\circ$  and the color atoms are at  $\theta = 76^\circ$ . They are colored by the voronoi volume change.
