# Supplementary material for: Twisting of a Pristine α-Fe Nanowire: From Wild Dislocation Avalanches to Mild Local Amorphization
Source: Nanomaterials (Basel). 2021 Jun 18;11(6):1602. doi: 10.3390/nano11061602 (PMC8234800; doi:10.3390/nano11061602)
Supplement: Supplementary file 1 [file nanomaterials-11-01602-s001.zip]

Archive with 5 entries (5 files):
- Movie-S1.mp4
- Movie-S2.mp4
- Movie-S3.mp4
- Movie-S4.mp4
- nanomaterials-1252693 sup final.pdf
